# Supplementary material for: Fe3O4@N-doped carbon derived from dye wastewater flocculates as a heterogeneous catalyst for degradation of methylene blue
Source: Royal Society of Chemistry journal article supplement (doi:10.1039/d2nj02905g), 2022-01-01
Supplement: d2nj02905g1.pdf [file d2nj02905g1.pdf]

**Fe<sub>3</sub>O<sub>4</sub>@N-doped carbon derived from dye wastewater flocculates as  
heterogeneous catalyst for degradation of methylene blue**

*Jinhua Ou<sup>1,2</sup>, Kejun Luo<sup>3</sup>, Hong Tan<sup>1</sup>, Ni Li<sup>1</sup>, Bonian Hu<sup>1\*</sup>, Gang Yu<sup>2\*</sup>,*

<sup>1</sup> School of Materials Science and Engineering, Hunan Institute of Technology,  
Hengyang, 421002, China.

<sup>2</sup> College of Chemistry and Chemical Engineering, Hunan University, Changsha,  
410082, China.

<sup>3</sup> Changsha Research Institute of Mining and Metallurgy Co., Ltd, Changsha,  
410012, China.

## **Experimental**

### ***2.1 Materials***

Iron pieces ( $2 \times 55 \times 50 \text{ mm}^3$ ) were received from Feiyue Metal Products Co., Ltd., which was used as anode and cathode materials. Sigma-Aldrich provided all chemical reagents without further purification. The simulated dye wastewater contains 2.7 mM Malachite Green (MG) dye and 10 mM  $\text{Na}_2\text{SO}_4$ .

### ***2.2 Characterizations***

X-ray diffraction (XRD) measurements were carried out using an X-ray powder diffractometer (Smart Lab 9KW, Japan). The morphology of the sample was recorded via scanning electron microscopy (SEM, SU8220, Japan) and high-resolution transmission electron microscopy (HRTEM, Tecnai G2 F20). X-ray photoelectron spectroscopy (XPS) patterns were collected using a non-monochromatic Al  $K\alpha$  X-ray source and a hemispherical energy analyzer (ESCALAB Xi+, English). Thermogravimetric analysis (TGA) and differential scanning calorimetry (DSC) were performed on a STA PT1600 system in a nitrogen atmosphere with a heating rate of  $0 \text{ }^\circ\text{C min}^{-1}$  in the temperature range of 30 –1000  $^\circ\text{C}$ .  $\text{N}_2$  adsorption-desorption isotherms were recorded using an automated gas sorption analyzer (BET, Autosorb-iQ-C, USA). EPR signals were recorded using a Bruker E500 spectro-meter. The settings for the EPR spectrometer were as follows: center field, 3502 G; sweep width, 100 G; power, 6.325mW. Ultraviolet-visible (UV-vis) spectra were recorded using the Shimadzu spectrophotometer (UV-3600 Plus, Japan).Magnetic hysteresis loops at room temperature were obtained using a VSM (LAKESHORE-7404, USA,  $\pm 2\text{T/MH}$ ) at room temperature. The iron content of the sample obtained by microwave-digested samples and the iron concentration were determined using inductively coupled plasma (ICP-MS, NexION 300D).

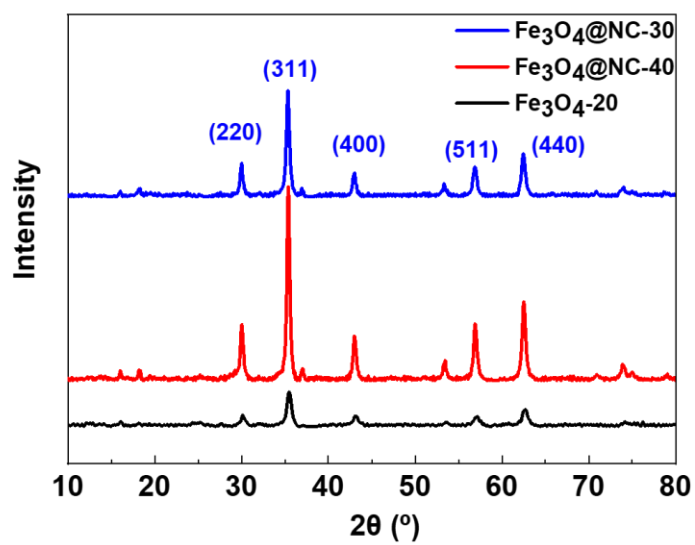

**Figure S1.** The XRD pattern of  $\text{Fe}_3\text{O}_4@\text{NC-30}$ ,  $\text{Fe}_3\text{O}_4@\text{NC-40}$  and  $\text{Fe}_3\text{O}_4\text{-20}$ .

**Table S1.** The removal efficiency of MG dye with different electrolysis time.

| method | Electrolysis time | Removal efficiency | Concentrations (mg/L) |
|--------|-------------------|--------------------|-----------------------|
| EC     | 5 min             | 95.37%             | 46.3                  |
|        | 10 min            | 99.08%             | 9.2                   |
|        | 20 min            | 100%               | undetected            |
|        | 30 min            | 100%               | undetected            |
|        | 40 min            | 100%               | undetected            |

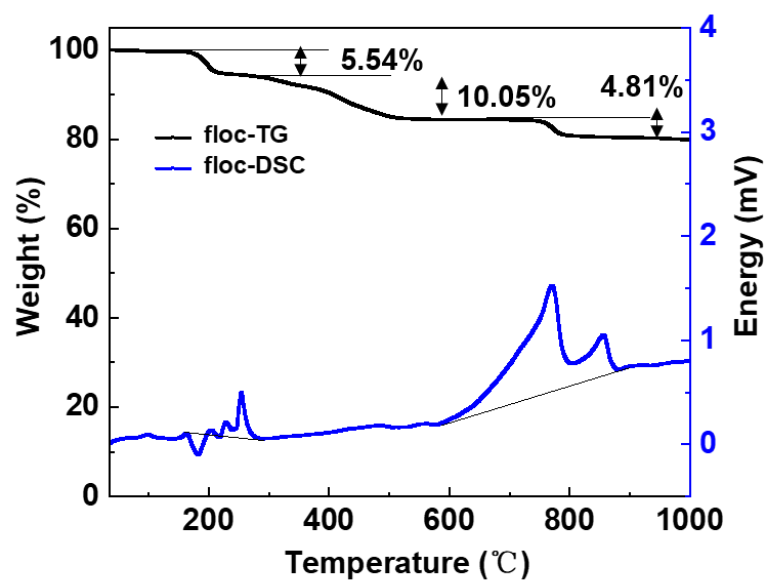

**Figure S2.** TGA and DSC curve of MG dye molecular.

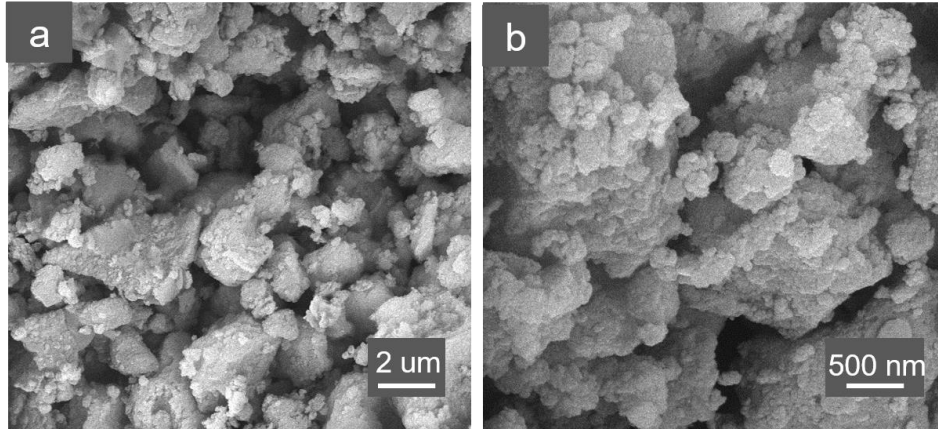

**Figure S3.** SEM images of the sample flocc-20-r (Fe<sub>3</sub>O<sub>4</sub>-20 precursor).

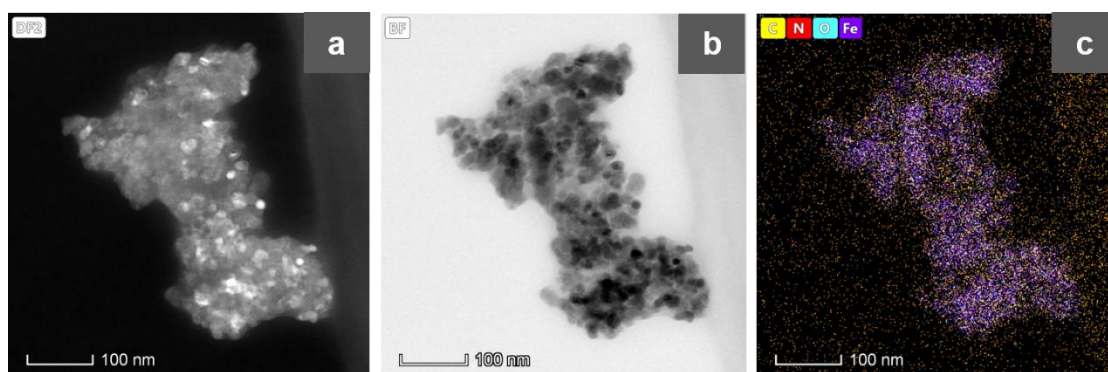

**Figure S4.** (a, b) the HAADF-STEM images; (c) the EDX elemental mapping image

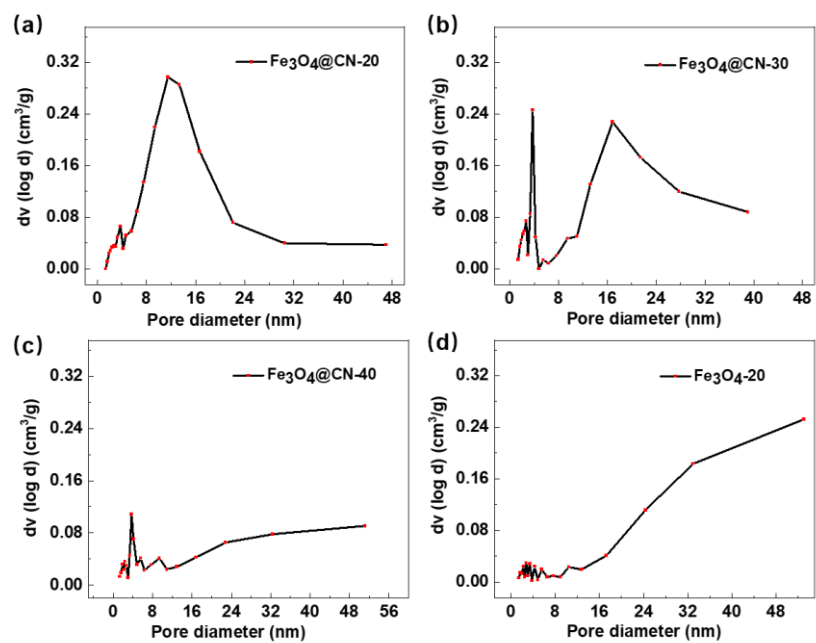

**Figure S5.** the BJH pore size distribution of  $\text{Fe}_3\text{O}_4@\text{NC}-20$ ,  $\text{Fe}_3\text{O}_4@\text{NC}-30$ ,  $\text{Fe}_3\text{O}_4@\text{NC}-40$  and  $\text{Fe}_3\text{O}_4-20$ .



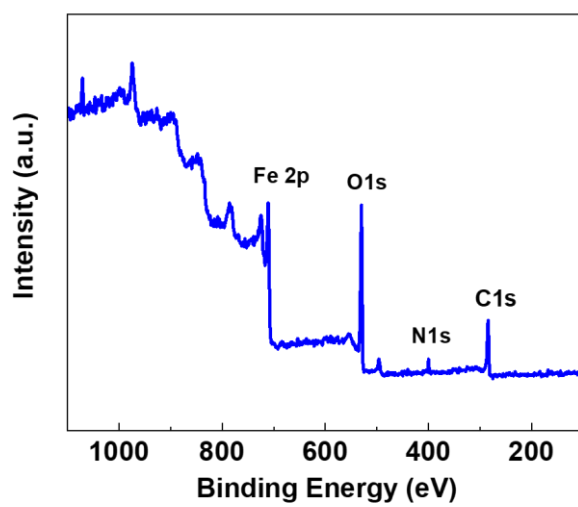

**Figure S6.** XPS spectra of Fe<sub>3</sub>O<sub>4</sub>@NC-20.

**Table S2.** Comparison of catalytic ability between Fe<sub>3</sub>O<sub>4</sub>@NC-20 and other reported Fe-based heterogeneous Fenton catalysts.

| Sample                                               | catalyst dosage(g/L) | MB (ppm) /Volume | H <sub>2</sub> O <sub>2</sub> (mmol/L) | Time (min) | TOC (%) /MB (%)    | leaching Fe (ppm) | References |
|------------------------------------------------------|----------------------|------------------|----------------------------------------|------------|--------------------|-------------------|------------|
| Fe <sub>3</sub> O <sub>4</sub> @C                    | 2.0                  | 40 (10 ml)       | 16                                     | 40         | 68/100             | 0.5               | [1]        |
| Fe <sub>3</sub> O <sub>4</sub> @C                    | 2.0                  | 60 (20 ml)       | 293                                    | 300        | 65/90              | -                 | [2]        |
| Fe <sub>3</sub> O <sub>4</sub> /SiO <sub>2</sub> /C  | 1.0                  | 50 (20 ml)       | 440                                    | 15         | 96/68 <sup>a</sup> | -                 | [3]        |
| Fe <sub>3</sub> O <sub>4</sub> /FeMnO <sub>x</sub>   | 0.5                  | 25 (200ml)       | 743                                    | 250        | -/98               | 1                 | [4]        |
| Fe <sub>3</sub> O <sub>4</sub> /TiO <sub>2</sub>     | 50                   | 1600 (1ml)       | 990                                    | 5          | -/99               | -                 | [5]        |
| Fe <sub>3</sub> O <sub>4</sub> @PDA-MnO <sub>2</sub> | 0.17                 | 40 (25ml)        | 1650                                   | 240        | 97.36              | -                 | [6]        |
| MoS <sub>2</sub> -Fe <sub>3</sub> O <sub>4</sub>     | 0.5                  | 20 (100ml)       | 50                                     | 20         | -/100              | -                 | [7]        |
| Fe <sub>3</sub> O <sub>4</sub> @MAFCC                | 0.6                  | 50 (50 ml)       | 59.4                                   | 20         | 37.2/100           | <2                | [8]        |
| Fe <sub>3</sub> O <sub>4</sub> /usGO                 | 0.0029               | 5 (50 ml)        | 10                                     | 120        | -/100              | 0.03              | [9]        |
| Fe <sub>3</sub> O <sub>4</sub> @NC-20                | 0.75                 | 50 (20 ml)       | 239                                    | 50         | 64/100             | 0.435             | This work  |

(-) Iron ions leaching is not reported. <sup>a</sup> COD removal (%).

**Table S3.** Magnetic Properties and Iron Content of Fe<sub>3</sub>O<sub>4</sub>@NC-20, Fe<sub>3</sub>O<sub>4</sub>@NC-30, Fe<sub>3</sub>O<sub>4</sub>@NC-40 and Fe<sub>3</sub>O<sub>4</sub>-20.

| Sample                                | Fe <sub>3</sub> O <sub>4</sub> (wt%) | Magnetic properties |        |                        |
|---------------------------------------|--------------------------------------|---------------------|--------|------------------------|
|                                       |                                      | Ms(emu/g)           | Hc(Oe) | M <sub>r</sub> (emu/g) |
| Fe <sub>3</sub> O <sub>4</sub> @NC-20 | 55.02%                               | 63.1                | 113.1  | 5.8                    |
| Fe <sub>3</sub> O <sub>4</sub> @NC-30 | 66.21%                               | 69.3                | 122.5  | 7.6                    |
| Fe <sub>3</sub> O <sub>4</sub> @NC-40 | 73.47%                               | 72.3                | 133.6  | 6.1                    |
| Fe <sub>3</sub> O <sub>4</sub> -20    | 95.03%                               | 76.2                | 142.3  | 5.3                    |

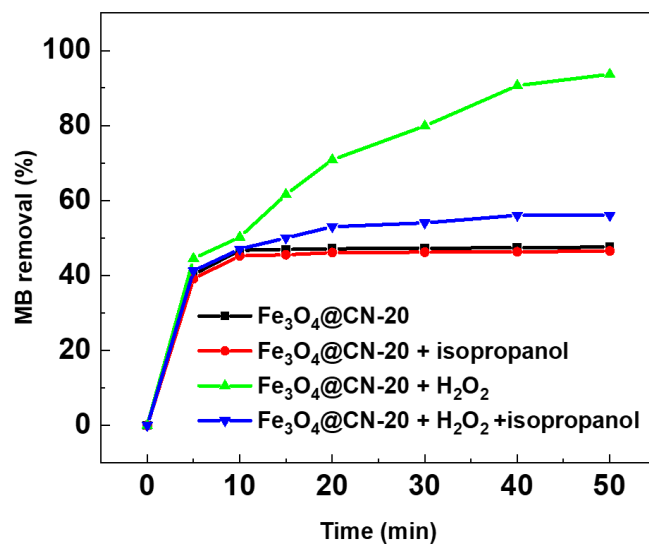

**Figure S7.** Removal efficiency of MB dye. Reaction conditions: catalyst,  $0.75 \text{ g L}^{-1}$ ;  $\text{H}_2\text{O}_2$ ,  $239 \text{ mmol L}^{-1}$ ; MB,  $50 \text{ mg L}^{-1}$ ; pH, 5.0.

## References

- [1] L. Zhou, Y. Shao, J. Liu, Z. Ye, H. Zhang, J. Ma, Y. Jia, W. Gao, Y. Li, Preparation and characterization of magnetic porous carbon microspheres for removal of methylene blue by a heterogeneous Fenton reaction, *ACS Appl Mater Interfaces* 6 (2014) 7275-85.
- [2] Y. Shao, L. Zhou, C. Bao, J. Ma, A facile approach to the fabrication of rattle-type magnetic carbon nanospheres for removal of methylene blue in water, *Carbon* 89 (2015) 378-391.
- [3] R. Wang, X. Liu, R. Wu, B. Yu, H. Li, X. Zhang, J. Xie, S.-T. Yang, Fe<sub>3</sub>O<sub>4</sub>/SiO<sub>2</sub>/C nanocomposite as a high-performance Fenton-like catalyst in a neutral environment, *RSC Advances* 6 (2016) 8594-8600.
- [4] S. Xing, Z. Zhou, Z. Ma, Y. Wu, Characterization and reactivity of Fe<sub>3</sub>O<sub>4</sub>/FeMnO<sub>x</sub> core/shell nanoparticles for methylene blue discoloration with H<sub>2</sub>O<sub>2</sub>, *Applied Catalysis B: Environmental* 107 (2011) 386-392.
- [5] M. Abbas, B. P. Rao, V. Reddy, C. Kim, Fe<sub>3</sub>O<sub>4</sub>/TiO<sub>2</sub> core/shell nanocubes: Single-batch surfactantless synthesis, characterization and efficient catalysts for methylene blue degradation, *Ceramics International* 40 (2014) 11177-11186.
- [6] X. Pan, S. Cheng, T. Su, G. Zuo, W. Zhao, X. Qi, W. Wei, W. Dong, Fenton-like catalyst Fe<sub>3</sub>O<sub>4</sub>@polydopamine-MnO<sub>2</sub> for enhancing removal of methylene blue in wastewater, *Colloids Surf B Biointerfaces* 181 (2019) 226-233.
- [7] K. Shen, Y. Cui, D. Zhang, M. Liu, H. Huang, X. Sha, F. Deng, N. Zhou, X. Zhang, Y. Wei, Biomimetic preparation of MoS<sub>2</sub>-Fe<sub>3</sub>O<sub>4</sub> MNPs as heterogeneous catalysts for the degradation of methylene blue, *Journal of Environmental Chemical Engineering* 8 (2020).
- [8] Q. Lu, Y. Zhang, H. Hu, W. Wang, Z. Huang, D. Chen, M. Yang, J. Liang, In Situ Synthesis of a Stable Fe<sub>3</sub>O<sub>4</sub>@Cellulose Nanocomposite for Efficient Catalytic Degradation of Methylene Blue, *Nanomaterials (Basel)* 9 (2019).
- [9] S. Song, Y. Wang, H. Shen, J. Zhang, H. Mo, J. Xie, N. Zhou, J. Shen, Ultrasmall Graphene Oxide Modified with Fe<sub>3</sub>O<sub>4</sub> Nanoparticles as a Fenton-Like Agent for Methylene Blue Degradation, *ACS Applied Nano Materials* 2 (2019) 7074-7084.
